# Supplementary material
Source: PubMed Central journal article supplement (PMC4882500)
Supplement: BPH-173-2046-s003.pdf [file BPH-173-2046-s003.pdf]

**Supplemental Figure 1.** Effect of 100 nM dofetilide on the action potential duration and on the short-term variability of the action potential duration in rabbit ventricular myocytes. *Top panels* show representative action potential recordings in the absence and presence of 100 nM dofetilide from wild type (*left*) and transgenic (*right*) ventricular myocytes. Bar graphs in *bottom panels* illustrate APD<sub>90</sub> (*left*) and the short-term variability of APD<sub>90</sub> (*right*) in control conditions and in the presence of 100 nM dofetilide in wild type (WT) and transgenic (TG) ventricular myocytes. Values are means  $\pm$  standard errors of the means. The measurements were taken from 6 WT and 6 TG rabbit hearts, “n” values on the graph represent the number of cells in each group.

**Supplemental Figure 2.** Representative ECG recordings from thiopental anesthetized wild type littermate (top panel) and transgenic (lower panel) rabbits at baseline (control) and following the i.v. administration of 20  $\mu\text{g kg}^{-1}$  dofetilide.
