# Supplementary material
Source: PubMed Central journal article supplement (PMC4882500)

### Wild type

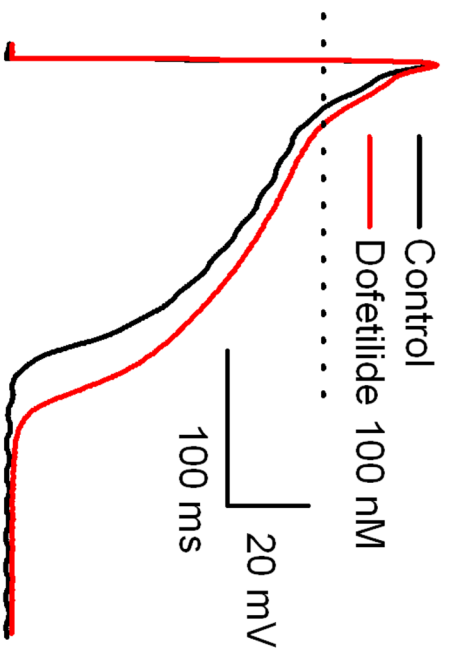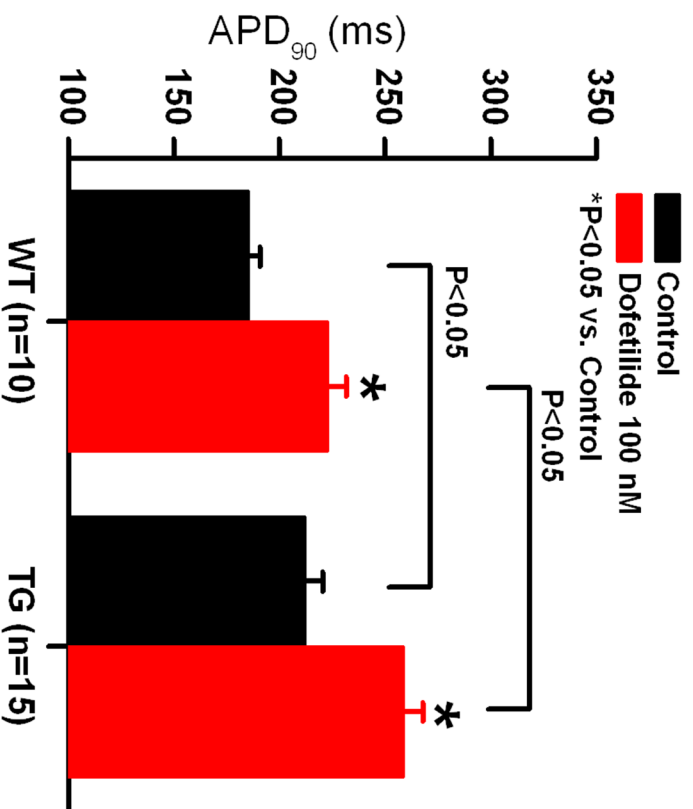

### Transgenic

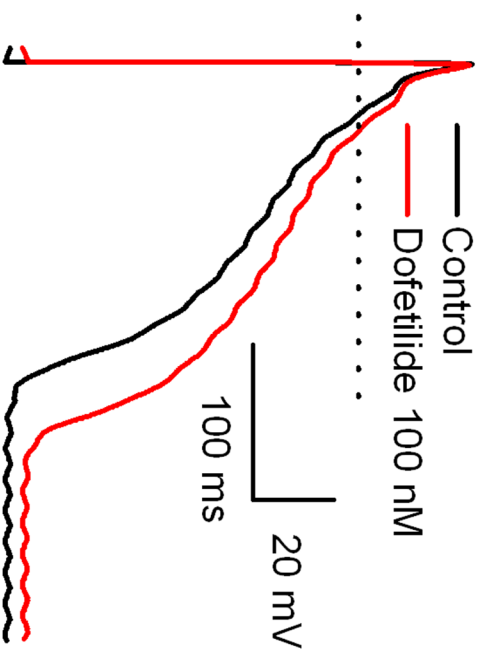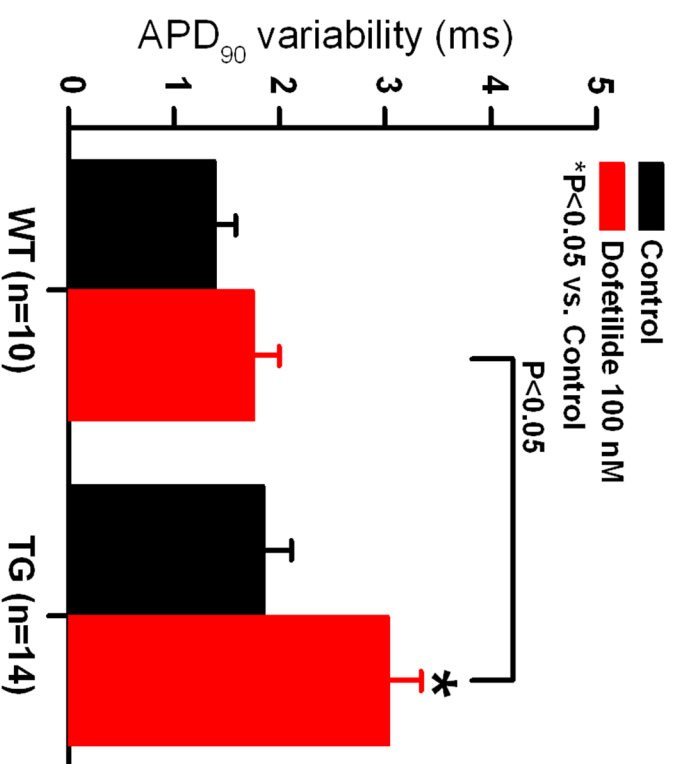

Supplement: BPH-173-2046-s001.pdf [file BPH-173-2046-s001.pdf]

## Wild type

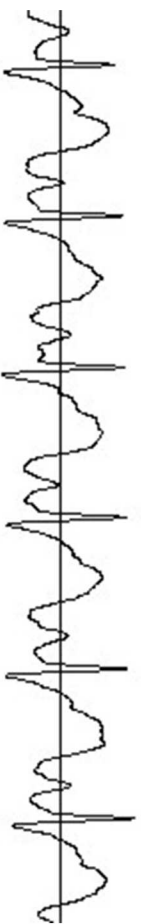

Control

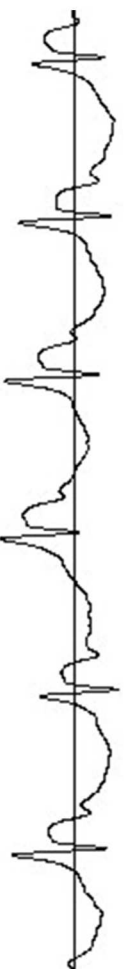

Dofetilide  
(20  $\mu\text{g kg}^{-1}$ , i.v.)

250 ms

## Transgenic

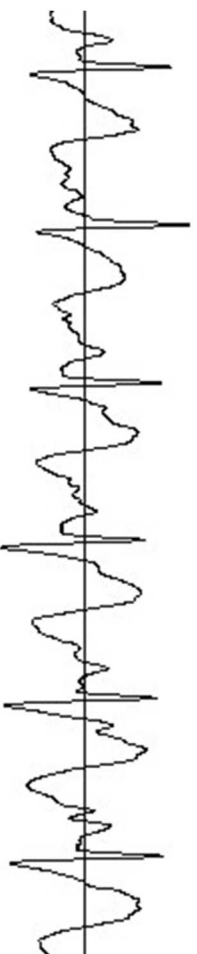

Control

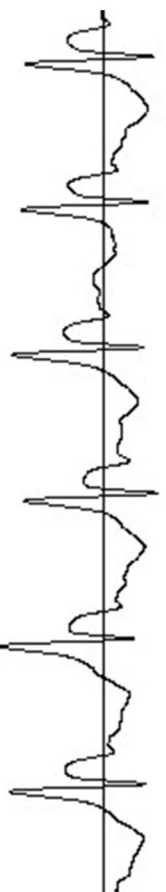

Dofetilide  
(20  $\mu\text{g kg}^{-1}$ , i.v.)

250 ms

Supplement: BPH-173-2046-s002.pdf [file BPH-173-2046-s002.pdf]
